# Supplementary material for: Metabolic regulation of pluripotency and germ cell fate through α‐ketoglutarate
Source: PubMed Central journal article supplement (PMC6315289; doi:10.15252/embj.201899518), 2018-09-26
Supplement: EMBJ-38-e99518-s001.pdf [file EMBJ-38-e99518-s001.pdf]

## Appendix

### Table of contents

Appendix Figure S1. OSN binding site analysis.

Appendix Table S1. KL-divergences for metabolic regulators.

Appendix Table S2. Genes for fitting the pseudotime model.

Appendix Table S3. P-Values Table.

## Appendix Figure S1

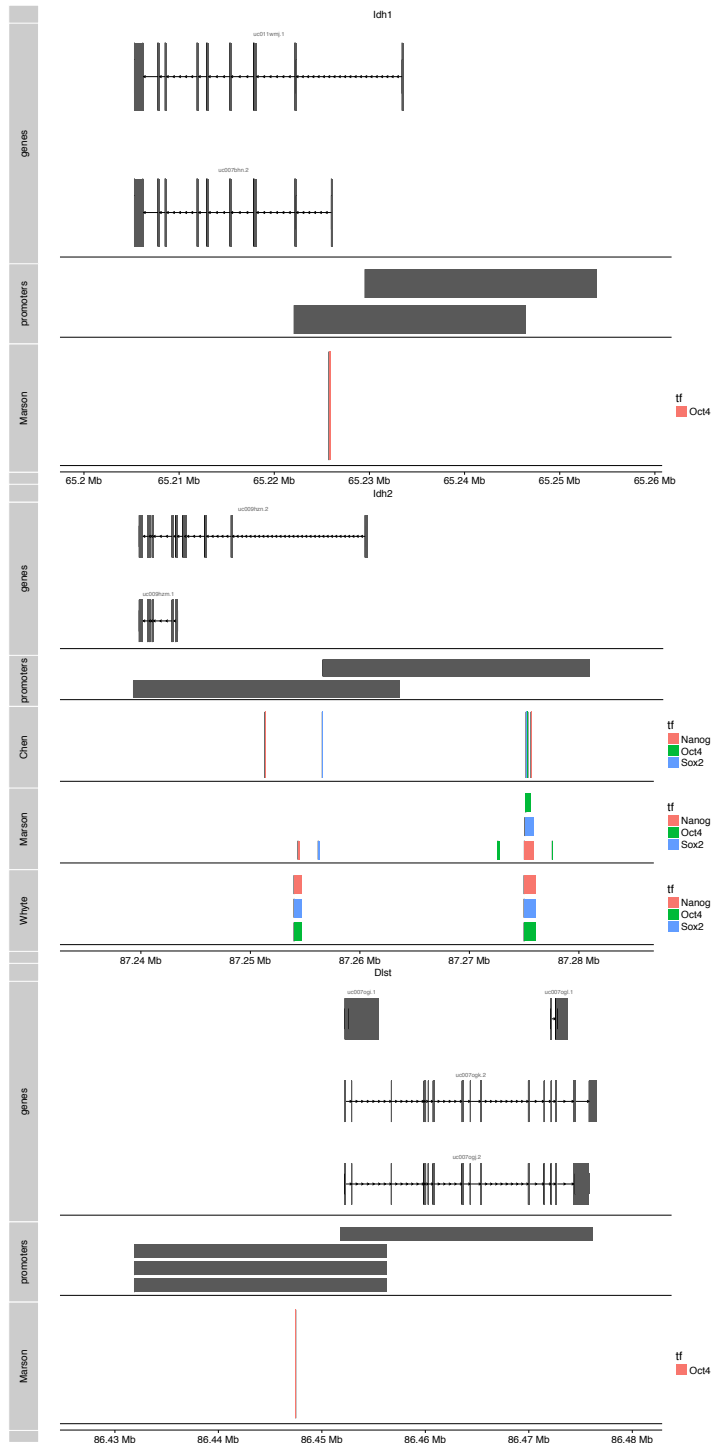

### Appendix Figure S1. OSN binding site analysis.

Graphical representation of OCT4, SOX2, and NANOG (OSN) occupancy within 20Kb upstream to 4Kb downstream of the transcriptional start sites of *Idh1*, *Idh2*, and *Dist*, respectively, based on three published ChIP-seq data sets (Chen, Xu et al., 2008, Marson, Levine et al., 2008, Whyte, Orlando et al., 2013).

| <b>Gene</b>  | <b>KL</b>   | <b>Name</b>     |
|--------------|-------------|-----------------|
| NM_023755    | 136.5236308 | <i>Tfcp2l1</i>  |
| NM_021480    | 66.1180974  | <i>Tdh</i>      |
| NM_053079    | 64.78301425 | <i>Slc15a1</i>  |
| NM_001159500 | 59.24311428 | <i>Esrrb</i>    |
| NM_010637    | 45.16484143 | <i>Klf4</i>     |
| NM_001040400 | 30.737241   | <i>Tet2</i>     |
| NM_011978    | 26.87833371 | <i>Slc27a2</i>  |
| NM_010203    | 25.80136211 | <i>Fgf5</i>     |
| NM_001099276 | 25.54584239 | <i>Pik3c2b</i>  |
| NM_001003960 | 23.79742667 | <i>Dnmt3b</i>   |
| NM_008183    | 17.0763945  | <i>Gstm2</i>    |
| NM_001253679 | 14.76349961 | <i>Slc7a7</i>   |
| NM_009944    | 14.68719555 | <i>Cox7a1</i>   |
| NM_001160180 | 13.91573125 | <i>Tor1aip2</i> |
| NM_028016    | 13.5537245  | <i>Nanog</i>    |
| NM_001003961 | 12.17205131 | <i>Dnmt3b</i>   |
| NM_013495    | 11.77658891 | <i>Cpt1a</i>    |
| NM_001122997 | 10.66290782 | <i>Dnmt3b</i>   |
| NM_001038695 | 9.957209816 | <i>Kdm3a</i>    |
| NM_008960    | 9.851206911 | <i>Pten</i>     |
| NM_001160181 | 9.630911571 | <i>Tor1aip2</i> |
| NM_175935    | 9.366872286 | <i>G6pc3</i>    |
| NM_173011    | 9.241755624 | <i>ldh2</i>     |
| NM_172436    | 8.425208893 | <i>Slc25a12</i> |
| NM_001136069 | 8.306550629 | <i>Ldha</i>     |
| NM_027439    | 8.066051293 | <i>Atp6ap2</i>  |
| NM_007747    | 8.03619448  | <i>Cox5a</i>    |
| NM_001031772 | 7.876657316 | <i>Lin28b</i>   |
| NM_008492    | 7.322423777 | <i>Ldhb</i>     |
| NM_010699    | 7.29780368  | <i>Ldha</i>     |
| NM_001146100 | 6.962250648 | <i>Hk1</i>      |
| NM_172665    | 6.953297813 | <i>Pdk1</i>     |
| NM_145833    | 6.743466644 | <i>Lin28a</i>   |
| NM_172843    | 6.597114656 | <i>Tor1aip2</i> |
| NM_001081182 | 6.162208023 | <i>Atp8b2</i>   |
| NM_001172095 | 5.89819671  | <i>Kdm4c</i>    |
| NM_013671    | 5.828072212 | <i>Sod2</i>     |
| NM_011492    | 5.425501274 | <i>Stk11</i>    |
| NM_008709    | 5.275073616 | <i>Mycn</i>     |
| NM_001111320 | 5.214763785 | <i>ldh1</i>     |
| NM_009415    | 5.108287653 | <i>Tpi1</i>     |
| NM_009716    | 4.901152355 | <i>Atf4</i>     |
| NM_025628    | 3.931267757 | <i>Cox6b1</i>   |
| NM_001242396 | 3.923271459 | <i>Jmjd1c</i>   |
| NM_015731    | 3.897092538 | <i>Atp9a</i>    |

|              |             |                 |
|--------------|-------------|-----------------|
| NM_011400    | 3.568088135 | <i>Slc2a1</i>   |
| NM_001111288 | 3.399598705 | <i>Sco2</i>     |
| NM_175094    | 3.386092857 | <i>Pdhx</i>     |
| NM_010359    | 3.332339942 | <i>Gstm3</i>    |
| NM_019739    | 3.28267624  | <i>Foxo1</i>    |
| NM_019703    | 3.154870194 | <i>Pfkp</i>     |
| NM_183220    | 3.112213109 | <i>Accs</i>     |
| NM_001081256 | 3.034419975 | <i>Kdm3b</i>    |
| NM_133826    | 2.999471784 | <i>Atp6v1h</i>  |
| NM_025973    | 2.890706328 | <i>Pgc</i>      |
| NM_011443    | 2.885444269 | <i>Sox2</i>     |
| NM_008839    | 2.865849187 | <i>Pik3ca</i>   |
| NM_030225    | 2.849991135 | <i>Dlst</i>     |
| NM_001177307 | 2.803183195 | <i>Aldoa</i>    |
| NM_011401    | 2.777608238 | <i>Slc2a3</i>   |
| NM_018789    | 2.74675669  | <i>Foxo4</i>    |
| NM_025494    | 2.664283917 | <i>Atp6v1c1</i> |
| NM_010324    | 2.648100212 | <i>Got1</i>     |
| NM_007510    | 2.473248138 | <i>Atp6v1e1</i> |
| NM_019488    | 2.371505725 | <i>Slc2a8</i>   |
| NM_001109757 | 2.334284827 | <i>Atp7a</i>    |
| NM_010497    | 2.298536711 | <i>ldh1</i>     |
| NM_011032    | 2.21817507  | <i>P4hb</i>     |
| NM_080467    | 2.160140668 | <i>Atp6v0a4</i> |
| NM_024200    | 2.140132576 | <i>Mfn1</i>     |
| NM_008826    | 2.079573308 | <i>Pfkl</i>     |
| NM_008133    | 2.01681379  | <i>Glud1</i>    |
| NM_016774    | 1.988253774 | <i>Atp5b</i>    |
| NM_008841    | 1.905943488 | <i>Pik3r2</i>   |
| NM_207215    | 1.875156746 | <i>Mycbp2</i>   |
| NM_181586    | 1.867105151 | <i>Sirt6</i>    |
| NM_011405    | 1.86210747  | <i>Slc7a7</i>   |
| NM_001159589 | 1.857653113 | <i>Sirt1</i>    |
| NM_009721    | 1.855012206 | <i>Atp1b1</i>   |
| NM_001029837 | 1.842031216 | <i>Pik3cd</i>   |
| NM_010513    | 1.682383127 | <i>Igf1r</i>    |
| NM_001163430 | 1.549433937 | <i>Sirt6</i>    |
| NM_183138    | 1.530409498 | <i>Tet3</i>     |
| NM_133667    | 1.490495189 | <i>Pdk2</i>     |
| NM_001161712 | 1.490048373 | <i>Gcat</i>     |
| NM_009662    | 1.470809205 | <i>Alox5</i>    |
| NM_008810    | 1.461813203 | <i>Pdha1</i>    |
| NM_001037863 | 1.453721013 | <i>Atp11c</i>   |
| NM_019660    | 1.452958226 | <i>Mycbp</i>    |
| NM_007505    | 1.443388258 | <i>Atp5a1</i>   |
| NM_172943    | 1.401109846 | <i>Alkbh5</i>   |

|              |             |                 |
|--------------|-------------|-----------------|
| NM_009804    | 1.383737885 | <i>Cat</i>      |
| NM_007438    | 1.370041743 | <i>Aldoa</i>    |
| NM_133249    | 1.356469527 | <i>Ppargc1b</i> |
| NM_198027    | 1.348694819 | <i>Alkbh6</i>   |
| NM_144787    | 1.331494177 | <i>Kdm4c</i>    |
| NM_001012518 | 1.322151752 | <i>Ehmt1</i>    |
| NM_010924    | 1.320716894 | <i>Nnmt</i>     |
| NM_001112738 | 1.312611249 | <i>Atp5c1</i>   |
| NM_013910    | 1.298427918 | <i>Kdm2b</i>    |
| NM_001205339 | 1.28434913  | <i>Psat1</i>    |
| NM_009660    | 1.276535144 | <i>Alox15</i>   |
| NM_145981    | 1.268300886 | <i>Phyhip</i>   |
| NM_010568    | 1.260367505 | <i>Insr</i>     |
| NM_011434    | 1.227102443 | <i>Sod1</i>     |
| NM_001036684 | 1.217154553 | <i>Atp2b2</i>   |
| NM_133198    | 1.176979173 | <i>Pygl</i>     |
| NM_175015    | 1.168146253 | <i>Atp5g3</i>   |
| NM_013415    | 1.16428202  | <i>Atp1b2</i>   |
| NM_026444    | 1.15907378  | <i>Cs</i>       |
| NM_173001    | 1.158194983 | <i>Kdm3a</i>    |
| NM_001037937 | 1.153883032 | <i>Deptor</i>   |
| NM_178386    | 1.15325574  | <i>Slc25a31</i> |
| NM_016755    | 1.09339947  | <i>Atp5j</i>    |
| NM_008618    | 1.079111938 | <i>Mdh1</i>     |
| NM_138679    | 1.071824995 | <i>Ash1l</i>    |
| NM_025910    | 1.059373031 | <i>Riox2</i>    |
| NM_026922    | 1.057047261 | <i>Atp2c2</i>   |
| NM_145494    | 1.029894462 | <i>Me2</i>      |
| NM_145630    | 1.029246657 | <i>Pdk3</i>     |
| NM_028386    | 1.02768843  | <i>Asphd2</i>   |
| NM_007994    | 1.016506074 | <i>Fbp2</i>     |
| NM_007861    | 1.016370289 | <i>Dld</i>      |
| NM_001033310 | 1.010569268 | <i>Cox18</i>    |
| NM_001163641 | 0.988796846 | <i>Setdb1</i>   |
| NM_010292    | 0.976599081 | <i>Gck</i>      |
| NM_029573    | 0.960778946 | <i>ldh3a</i>    |
| NM_145470    | 0.954952729 | <i>Deptor</i>   |
| NM_080633    | 0.936684633 | <i>Aco2</i>     |
| NM_001198933 | 0.928565155 | <i>Me1</i>      |
| NM_008173    | 0.925604891 | <i>Nr3c1</i>    |
| NM_001193271 | 0.920817407 | <i>Meis1</i>    |
| NM_009723    | 0.911506969 | <i>Atp2b2</i>   |
| NM_013477    | 0.901767755 | <i>Atp6v0d1</i> |
| NM_145569    | 0.886938415 | <i>Mat2a</i>    |
| NM_026536    | 0.877160049 | <i>Atp5s</i>    |
| NM_001243053 | 0.873992415 | <i>Bcat2</i>    |

|              |             |                 |
|--------------|-------------|-----------------|
| NM_175460    | 0.854063649 | <i>Nmnat2</i>   |
| NM_011785    | 0.851235735 | <i>Akt3</i>     |
| NM_172132    | 0.842449376 | <i>Kdm4b</i>    |
| NM_133872    | 0.839972271 | <i>Kdm1a</i>    |
| NM_001080809 | 0.837695878 | <i>Cps1</i>     |
| NM_020009    | 0.831999334 | <i>Mtor</i>     |
| NM_001127233 | 0.831450019 | <i>Trp53</i>    |
| NM_001081212 | 0.829382931 | <i>Irs2</i>     |
| NM_001199296 | 0.821229493 | <i>Acly</i>     |
| NM_001163642 | 0.811409348 | <i>Setdb1</i>   |
| NM_026094    | 0.795893472 | <i>Atp8b3</i>   |
| NM_001039645 | 0.773051599 | <i>Asphd1</i>   |
| NM_181040    | 0.754084431 | <i>Atpaf1</i>   |
| NM_022724    | 0.750942258 | <i>Suv39h2</i>  |
| NM_007750    | 0.73373021  | <i>Cox8a</i>    |
| NM_175111    | 0.725806687 | <i>Hspbap1</i>  |
| NM_021877    | 0.720552442 | <i>Hr</i>       |
| NM_001081081 | 0.705210135 | <i>Gls</i>      |
| NM_007512    | 0.703754649 | <i>Atpif1</i>   |
| NM_019740    | 0.667227361 | <i>Foxo3</i>    |
| NM_025321    | 0.663332217 | <i>Sdhc</i>     |
| NM_007749    | 0.646908151 | <i>Cox7c</i>    |
| NM_008615    | 0.642949004 | <i>Me1</i>      |
| NM_197980    | 0.64103693  | <i>Cox19</i>    |
| NM_144533    | 0.629492888 | <i>Nmnat3</i>   |
| NM_011528    | 0.624342848 | <i>Taldo1</i>   |
| NM_001243052 | 0.609472729 | <i>Bcat2</i>    |
| NM_138758    | 0.604916123 | <i>Tmlhe</i>    |
| NM_130451    | 0.603969868 | <i>Slc2a10</i>  |
| NM_133435    | 0.60182131  | <i>Nmnat1</i>   |
| NM_011640    | 0.59795626  | <i>Trp53</i>    |
| NM_007509    | 0.5950886   | <i>Atp6v1b2</i> |
| NM_153056    | 0.594640166 | <i>Sirt7</i>    |
| NM_001001984 | 0.586491797 | <i>Kdm2a</i>    |
| NM_009887    | 0.583144847 | <i>Cer1</i>     |
| NM_001252288 | 0.578964079 | <i>Ogdh</i>     |
| NM_178029    | 0.577833801 | <i>Setd1a</i>   |
| NM_009725    | 0.577004099 | <i>Atp5f1</i>   |
| NM_025461    | 0.570272145 | <i>Cox16</i>    |
| NM_001177753 | 0.563132694 | <i>Pfkfb3</i>   |
| NM_033325    | 0.553446387 | <i>Loxl2</i>    |
| NM_001253680 | 0.549403531 | <i>Slc7a7</i>   |
| NM_011786    | 0.54857379  | <i>Aloxe3</i>   |
| NM_033398    | 0.548175476 | <i>Jmjd6</i>    |
| NM_010726    | 0.543911265 | <i>Phyh</i>     |
| NM_011506    | 0.538166886 | <i>Sucla2</i>   |

|              |             |                 |
|--------------|-------------|-----------------|
| NM_007531    | 0.532941456 | <i>Phb2</i>     |
| NM_026944    | 0.513243562 | <i>Alkbh3</i>   |
| NM_172659    | 0.508291198 | <i>Slc2a6</i>   |
| NM_001167691 | 0.502714564 | <i>Sirt4</i>    |
| NM_001243051 | 0.501960996 | <i>Atp6v0a1</i> |
| NM_001177627 | 0.486516699 | <i>Slc2a6</i>   |
| NM_007748    | 0.478069468 | <i>Cox6a1</i>   |
| NM_009726    | 0.475664388 | <i>Atp7a</i>    |
| NM_011722    | 0.474725924 | <i>Dctn6</i>    |
| NM_001163456 | 0.470273021 | <i>Cox18</i>    |
| NM_177161    | 0.46606486  | <i>P4ha3</i>    |
| NM_025379    | 0.465887808 | <i>Cox7b</i>    |
| NM_011596    | 0.465223111 | <i>Atp6v0a2</i> |
| NM_008617    | 0.443065082 | <i>Mdh2</i>     |
| NM_013534    | 0.432736208 | <i>P3h3</i>     |
| NM_080793    | 0.418037052 | <i>Setd7</i>    |
| NM_001099779 | 0.41741604  | <i>Pklr</i>     |
| NM_023179    | 0.414136688 | <i>Atp6v1g2</i> |
| NM_026672    | 0.407767064 | <i>Gstm7</i>    |
| NM_133201    | 0.402406423 | <i>Mfn2</i>     |
| NM_013847    | 0.401400792 | <i>Gcat</i>     |
| NM_178848    | 0.400924451 | <i>Sirt5</i>    |
| NM_173866    | 0.400601968 | <i>Gpt2</i>     |
| NM_009652    | 0.395357122 | <i>Akt1</i>     |
| NM_029094    | 0.391494226 | <i>Pik3cb</i>   |
| NM_001017429 | 0.388553578 | <i>Cox17</i>    |
| NM_018731    | 0.386793013 | <i>Atp4a</i>    |
| NM_145427    | 0.382813539 | <i>Atpaf2</i>   |
| NM_025313    | 0.381322244 | <i>Atp5d</i>    |
| NM_001165894 | 0.377657907 | <i>Akt1</i>     |
| NM_138597    | 0.370856903 | <i>Atp5o</i>    |
| NM_173433    | 0.368847459 | <i>Kdm4d</i>    |
| NM_001252287 | 0.362196583 | <i>Ogdh</i>     |
| NM_023633    | 0.35270362  | <i>Riox1</i>    |
| NM_144900    | 0.350672368 | <i>Atp1a1</i>   |
| NM_010942    | 0.348644155 | <i>Nsg1</i>     |
| NM_178934    | 0.345020686 | <i>Slc2a12</i>  |
| NM_007933    | 0.342925847 | <i>Eno3</i>     |
| NM_001256380 | 0.338844329 | <i>Prdm2</i>    |
| NM_007988    | 0.333030002 | <i>Fasn</i>     |
| NM_028133    | 0.328713444 | <i>Egln3</i>    |
| NM_001177308 | 0.326130776 | <i>Aldoa</i>    |
| NM_009659    | 0.321712107 | <i>Alox12b</i>  |
| NM_009737    | 0.320738821 | <i>Bcat2</i>    |
| NM_001160182 | 0.320088603 | <i>Tor1aip2</i> |
| NM_011083    | 0.315420277 | <i>Pik3c2a</i>  |

|              |             |                 |
|--------------|-------------|-----------------|
| NM_177767    | 0.313646302 | <i>Ogfod1</i>   |
| NM_001177804 | 0.298267847 | <i>Sirt3</i>    |
| NM_011962    | 0.292734506 | <i>Plod3</i>    |
| NM_001122765 | 0.288246562 | <i>Sirt2</i>    |
| NM_001024955 | 0.287701614 | <i>Pik3r1</i>   |
| NM_008811    | 0.282581731 | <i>Pdha2</i>    |
| NM_010360    | 0.282150159 | <i>Gstm5</i>    |
| NM_011122    | 0.281175023 | <i>Plod1</i>    |
| NM_172382    | 0.276647788 | <i>Kdm4a</i>    |
| NM_053091    | 0.276526004 | <i>Cox4i2</i>   |
| NM_001164051 | 0.276031367 | <i>Pik3cd</i>   |
| NM_053207    | 0.275658318 | <i>Egln1</i>    |
| NM_010828    | 0.270546792 | <i>Cited2</i>   |
| NM_019811    | 0.269087266 | <i>Acss2</i>    |
| NM_001243049 | 0.26885761  | <i>Atp6v0a1</i> |
| NM_009484    | 0.265431107 | <i>Uty</i>      |
| NM_025983    | 0.261812948 | <i>Atp5e</i>    |
| NM_001025250 | 0.260856537 | <i>Vegfa</i>    |
| NM_001077495 | 0.258774581 | <i>Pik3r1</i>   |
| NM_031248    | 0.258041963 | <i>Lamtor2</i>  |
| NM_001199274 | 0.257493649 | <i>Mat2b</i>    |
| NM_001102565 | 0.244080609 | <i>Alkbh1</i>   |
| NM_133224    | 0.243142144 | <i>Atp13a1</i>  |
| NM_013734    | 0.239511716 | <i>Atp1a4</i>   |
| NM_001177855 | 0.239101397 | <i>Asph</i>     |
| NM_011145    | 0.23868989  | <i>Ppard</i>    |
| NM_009657    | 0.238250671 | <i>Aldoc</i>    |
| NM_001039049 | 0.237349248 | <i>Cox8c</i>    |
| NM_023374    | 0.231524435 | <i>Sdhb</i>     |
| NM_001253857 | 0.227302932 | <i>Tet1</i>     |
| NM_001142804 | 0.225826216 | <i>Acss3</i>    |
| NM_001253920 | 0.222989439 | <i>Akt1s1</i>   |
| NM_009877    | 0.221289711 | <i>Cdkn2a</i>   |
| NM_181414    | 0.216966467 | <i>Pik3c3</i>   |
| NM_153389    | 0.215245681 | <i>Atp10d</i>   |
| NM_001177856 | 0.211075465 | <i>Asph</i>     |
| NM_001109686 | 0.208408781 | <i>Ehmt1</i>    |
| NM_009949    | 0.204367651 | <i>Cpt2</i>     |
| NM_010358    | 0.202889855 | <i>Gstm1</i>    |
| NM_001136062 | 0.200866143 | <i>Eno3</i>     |
| NM_001136076 | 0.200203224 | <i>P4ha2</i>    |
| NM_009728    | 0.190741059 | <i>Atp10a</i>   |
| NM_009941    | 0.190027952 | <i>Cox4i1</i>   |
| NM_177420    | 0.189603465 | <i>Psat1</i>    |
| NM_001042411 | 0.187689788 | <i>P3h1</i>     |
| NM_009942    | 0.187678502 | <i>Cox5b</i>    |



|              |             |                 |
|--------------|-------------|-----------------|
| NM_030052    | 0.186865668 | <i>Cox7b2</i>   |
| NM_001163487 | 0.18671099  | <i>Pfkm</i>     |
| NM_001167949 | 0.183134337 | <i>Atp2b4</i>   |
| NM_001205043 | 0.183101374 | <i>Jarid2</i>   |
| NM_011936    | 0.181299626 | <i>Fto</i>      |
| NM_025504    | 0.177640903 | <i>Dmac2</i>    |
| NM_029097    | 0.175717446 | <i>Atp13a2</i>  |
| NM_207221    | 0.174501037 | <i>Jmjd1c</i>   |
| NM_001114637 | 0.173831981 | <i>Jmjd7</i>    |
| NM_001177850 | 0.17106047  | <i>Asph</i>     |
| NM_001128094 | 0.16337336  | <i>Atp13a3</i>  |
| NM_001110266 | 0.153540566 | <i>Vegfa</i>    |
| NM_027188    | 0.153412809 | <i>Smyd3</i>    |
| NM_134017    | 0.153313594 | <i>Mat2b</i>    |
| NM_001033264 | 0.152094633 | <i>Gls2</i>     |
| NM_001253834 | 0.151746805 | <i>Atp2c1</i>   |
| NM_001110140 | 0.146903055 | <i>Atp2a2</i>   |
| NM_020582    | 0.146761137 | <i>Atp5j2</i>   |
| NM_001001488 | 0.143888803 | <i>Atp8b1</i>   |
| NM_147151    | 0.143328134 | <i>Ehmt2</i>    |
| NM_025576    | 0.141680581 | <i>Ptpmt1</i>   |
| NM_008904    | 0.139271683 | <i>Ppargc1a</i> |
| NM_007386    | 0.138650718 | <i>Aco1</i>     |
| NM_008155    | 0.137852277 | <i>Gpi1</i>     |
| NM_178143    | 0.137024968 | <i>Prkaa2</i>   |
| NM_008131    | 0.136965646 | <i>Glul</i>     |
| NM_018794    | 0.134712188 | <i>Atp6ap1</i>  |
| NM_022433    | 0.131368948 | <i>Sirt3</i>    |
| NM_013743    | 0.130331789 | <i>Pdk4</i>     |
| NM_023326    | 0.130109322 | <i>Bmyc</i>     |
| NM_138595    | 0.129149837 | <i>Gldc</i>     |
| NM_001142916 | 0.127845695 | <i>Plod2</i>    |
| NM_053208    | 0.12775186  | <i>Egln2</i>    |
| NM_025848    | 0.127376307 | <i>Sdhd</i>     |
| NM_010431    | 0.12716126  | <i>Hif1a</i>    |
| NM_146236    | 0.126819496 | <i>Tceal1</i>   |
| NM_001080944 | 0.126252    | <i>Atp8b4</i>   |
| NM_001001798 | 0.125558844 | <i>Atp11c</i>   |
| NM_021878    | 0.121086145 | <i>Jarid2</i>   |
| NM_023281    | 0.118753486 | <i>Sdha</i>     |
| NM_001177752 | 0.11555919  | <i>Pfkfb3</i>   |
| NM_018870    | 0.114736262 | <i>Pgam2</i>    |
| NM_019782    | 0.113630105 | <i>P3h1</i>     |
| NM_011514    | 0.112887391 | <i>Suv39h1</i>  |
| NM_001243050 | 0.111273922 | <i>Atp6v0a1</i> |
| NM_009663    | 0.109986151 | <i>Alox5ap</i>  |

|              |             |                |
|--------------|-------------|----------------|
| NM_001093757 | 0.109678539 | <i>Ogfod1</i>  |
| NM_028944    | 0.109307171 | <i>P4htm</i>   |
| NM_001127351 | 0.108648573 | <i>Sirt3</i>   |
| NM_182805    | 0.108528809 | <i>Gpt</i>     |
| NM_173371    | 0.108497869 | <i>H6pd</i>    |
| NM_145830    | 0.105270852 | <i>Ehmt2</i>   |
| NM_001164050 | 0.104131147 | <i>Pik3cd</i>  |
| NM_011044    | 0.102157621 | <i>Pck1</i>    |
| NM_009388    | 0.099567604 | <i>Tkt</i>     |
| NM_010209    | 0.098770119 | <i>Fh1</i>     |
| NM_145997    | 0.098537747 | <i>Kdm5a</i>   |
| NM_013820    | 0.098095328 | <i>Hk2</i>     |
| NM_001199177 | 0.097429271 | <i>Opa1</i>    |
| NM_001252470 | 0.096268051 | <i>Cpt1c</i>   |
| NM_183405    | 0.096103213 | <i>Cox6b2</i>  |
| NM_053071    | 0.094717158 | <i>Cox6c</i>   |
| NM_029570    | 0.094343255 | <i>Atp11b</i>  |
| NM_027570    | 0.091406642 | <i>Ldhd</i>    |
| NM_026000    | 0.089602472 | <i>Psmc9</i>   |
| NM_011031    | 0.088252185 | <i>P4ha2</i>   |
| NM_033617    | 0.087940349 | <i>Atp6v0b</i> |
| NM_001081309 | 0.087816449 | <i>Pik3r4</i>  |
| NM_173379    | 0.087551705 | <i>P3h2</i>    |
| NM_028101    | 0.085262396 | <i>Jmjd8</i>   |
| NM_172262    | 0.085005168 | <i>Kdm1b</i>   |
| NM_007507    | 0.083663574 | <i>Atp5k</i>   |
| NM_133900    | 0.082745261 | <i>Psph</i>    |
| NM_152895    | 0.08006383  | <i>Kdm5b</i>   |
| NM_001081355 | 0.079312961 | <i>Prdm2</i>   |
| NM_001253836 | 0.079253215 | <i>Atp2c1</i>  |
| NM_008825    | 0.078714295 | <i>Pfkfb2</i>  |
| NM_019395    | 0.071598257 | <i>Fbp1</i>    |
| NM_001113354 | 0.071143216 | <i>Phf8</i>    |
| NM_001162416 | 0.068446227 | <i>Pfkfb2</i>  |
| NM_025272    | 0.068320212 | <i>Atp6v0e</i> |
| NM_178405    | 0.066947071 | <i>Atp1a2</i>  |
| NM_177320    | 0.066800325 | <i>Pik3r5</i>  |
| NM_178659    | 0.060253203 | <i>Jmjd4</i>   |
| NM_177195    | 0.057848243 | <i>Atp8b5</i>  |
| NM_009727    | 0.057379611 | <i>Atp8a1</i>  |
| NM_001164366 | 0.057089022 | <i>Atp13a2</i> |
| NM_001253831 | 0.055422969 | <i>Atp2c1</i>  |
| NM_011086    | 0.053937197 | <i>Pikfyve</i> |
| NM_010438    | 0.053439074 | <i>Hk1</i>     |
| NM_001163336 | 0.052775601 | <i>Atp2a3</i>  |
| NM_001081274 | 0.050975243 | <i>Pgd</i>     |

|              |             |                |
|--------------|-------------|----------------|
| NM_007970    | 0.050930248 | <i>Ezh1</i>    |
| NM_007508    | 0.050749122 | <i>Atp6v1a</i> |
| NM_178379    | 0.049468533 | <i>Cox10</i>   |
| NM_019812    | 0.049309924 | <i>Sirt1</i>   |
| NM_010729    | 0.048582032 | <i>Loxl1</i>   |
| NM_009875    | 0.04794159  | <i>Cdkn1b</i>  |
| NM_015804    | 0.04698102  | <i>Atp11a</i>  |
| NM_183406    | 0.0467239   | <i>Cox6b2</i>  |
| NM_181407    | 0.045399221 | <i>Me3</i>     |
| NM_177201    | 0.045017717 | <i>Phf8</i>    |
| NM_145614    | 0.044923782 | <i>Dlat</i>    |
| NM_001205181 | 0.043508755 | <i>Abhd4</i>   |
| NM_001160411 | 0.041691196 | <i>Gstm4</i>   |
| NM_001146689 | 0.039554403 | <i>Ezh2</i>    |
| NM_001113383 | 0.039209932 | <i>Gls</i>     |
| NM_019741    | 0.036149677 | <i>Slc2a5</i>  |
| NM_009661    | 0.035131152 | <i>Alox8</i>   |
| NM_001252283 | 0.03460966  | <i>Ogdh</i>    |
| NM_001013372 | 0.033531496 | <i>Alkbh1</i>  |
| NM_007971    | 0.033007097 | <i>Ezh2</i>    |
| NM_011078    | 0.032860561 | <i>Phf2</i>    |
| NM_001017426 | 0.031869707 | <i>Kdm6b</i>   |
| NM_011030    | 0.031827383 | <i>P4ha1</i>   |
| NM_028070    | 0.030114982 | <i>Alkbh4</i>  |
| NM_020615    | 0.028720209 | <i>Atp5c1</i>  |
| NM_009196    | 0.028710223 | <i>Slc16a1</i> |
| NM_025396    | 0.028416129 | <i>Pgls</i>    |
| NM_175025    | 0.028084579 | <i>Atp2c1</i>  |
| NM_009722    | 0.027802554 | <i>Atp2a2</i>  |
| NM_023721    | 0.02734575  | <i>Atp6v1d</i> |
| NM_080575    | 0.027125342 | <i>Acss1</i>   |
| NM_001205068 | 0.026305482 | <i>Jmjd4</i>   |
| NM_013580    | 0.025634517 | <i>Ldhc</i>    |
| NM_009948    | 0.025319384 | <i>Cpt1b</i>   |
| NM_013668    | 0.024850957 | <i>Kdm5c</i>   |
| NM_001177758 | 0.024645962 | <i>Pfkfb3</i>  |
| NM_025675    | 0.023665244 | <i>Dph6</i>    |
| NM_001031667 | 0.022339877 | <i>Gsk3a</i>   |
| NM_001128096 | 0.021277703 | <i>Atp13a3</i> |
| NM_031376    | 0.021006366 | <i>Pik3ap1</i> |
| NM_133360    | 0.020618454 | <i>Acaca</i>   |
| NM_153150    | 0.01979387  | <i>Slc25a1</i> |
| NM_030168    | 0.019299166 | <i>Rictor</i>  |
| NM_001033245 | 0.018366633 | <i>Hk3</i>     |
| NM_001205044 | 0.018292888 | <i>Jarid2</i>  |
| NM_013586    | 0.018154656 | <i>Loxl3</i>   |

|              |             |                 |
|--------------|-------------|-----------------|
| NM_176958    | 0.017510417 | <i>Hif1an</i>   |
| NM_025671    | 0.017034066 | <i>Ogfod2</i>   |
| NM_023525    | 0.016962153 | <i>Cad</i>      |
| NM_181585    | 0.016291674 | <i>Pik3r3</i>   |
| NM_001201569 | 0.015731079 | <i>Atp9b</i>    |
| NM_013509    | 0.015728439 | <i>Eno2</i>     |
| NM_011671    | 0.015591862 | <i>Ucp2</i>     |
| NM_019879    | 0.01489249  | <i>Suclg1</i>   |
| NM_029842    | 0.014779935 | <i>Kdm8</i>     |
| NM_009945    | 0.014284486 | <i>Cox7a2</i>   |
| NM_025683    | 0.013931503 | <i>Rpe</i>      |
| NM_001033430 | 0.012285744 | <i>Kdm7a</i>    |
| NM_001252570 | 0.011256969 | <i>Phyhd1</i>   |
| NM_008184    | 0.010380485 | <i>Gstm6</i>    |
| NM_172748    | 0.009393959 | <i>Fbxl19</i>   |
| NM_001163488 | 0.00929405  | <i>Pfkm</i>     |
| NM_001003953 | 0.008716987 | <i>Kdm2b</i>    |
| NM_001040654 | 0.008307186 | <i>Cdkn2a</i>   |
| NM_133764    | 0.007996534 | <i>Atp6v0e2</i> |
| NM_001177353 | 0.007676173 | <i>Myc</i>      |
| NM_026482    | 0.007392815 | <i>Atp2b1</i>   |
| NM_023058    | 0.006830264 | <i>Pkmyt1</i>   |
| NM_015803    | 0.006662922 | <i>Atp8a2</i>   |
| NM_130884    | 0.006355969 | <i>Idh3b</i>    |
| NM_001177849 | 0.006299505 | <i>Asph</i>     |
| NM_144809    | 0.006098807 | <i>Prdm9</i>    |
| NM_001252282 | 0.005976181 | <i>Ogdh</i>     |
| NM_001162946 | 0.005800128 | <i>Pcx</i>      |
| NM_019468    | 0.00579088  | <i>G6pd2</i>    |
| NM_144921    | 0.005717197 | <i>NA</i>       |
| NM_008323    | 0.00553963  | <i>Idh3g</i>    |
| NM_007502    | 0.005529272 | <i>Atp1b3</i>   |
| NM_144874    | 0.005353688 | <i>Cox15</i>    |
| NM_001164049 | 0.005155735 | <i>Pik3cd</i>   |
| NM_008840    | 0.005155735 | <i>Pik3cd</i>   |
| NM_009463    | 0.005155735 | <i>Ucp1</i>     |
| NM_011419    | 0.005026527 | <i>Kdm5d</i>    |
| NM_178149    | 0.004711669 | <i>Pik3ip1</i>  |
| NM_022432    | 0.00430147  | <i>Sirt2</i>    |
| NM_007511    | 0.003694542 | <i>Atp7b</i>    |
| NM_001161823 | 0.003511517 | <i>Kdm4a</i>    |
| NM_010241    | 0.003331804 | <i>Aktip</i>    |
| NM_173019    | 0.003186771 | <i>Pfkfb4</i>   |
| NM_199008    | 0.003150349 | <i>Cox11</i>    |
| NM_175016    | 0.002733315 | <i>Alkbh2</i>   |
| NM_001038999 | 0.00267217  | <i>Atp8a1</i>   |

|              |             |                 |
|--------------|-------------|-----------------|
| NM_001085529 | 0.002198998 | <i>Slc2a7</i>   |
| NM_010570    | 0.002053046 | <i>Irs1</i>     |
| NM_001177352 | 0.001953659 | <i>Myc</i>      |
| NM_026764    | 0.001863054 | <i>Gstm4</i>    |
| NM_001252568 | 0.001639729 | <i>Phyhd1</i>   |
| NM_007440    | 0.001549205 | <i>Alox12</i>   |
| NM_026270    | 0.001481499 | <i>Akt1s1</i>   |
| NM_022887    | 0.001346574 | <i>Tsc1</i>     |
| NM_134076    | 0.001113156 | <i>Abhd4</i>    |
| NM_011934    | 8.38E-04    | <i>Esrrb</i>    |
| NM_153679    | 8.22E-04    | <i>Cpt1c</i>    |
| NM_007504    | 8.05E-04    | <i>Atp2a1</i>   |
| NM_008324    | 7.60E-04    | <i>Ido1</i>     |
| NM_021514    | 7.43E-04    | <i>Pfkm</i>     |
| NM_008062    | 4.58E-04    | <i>G6pdx</i>    |
| NM_001162415 | 4.54E-04    | <i>Pfkfb2</i>   |
| NM_009483    | 4.44E-04    | <i>Kdm6a</i>    |
| NM_001159632 | 4.15E-04    | <i>Atp6v1c2</i> |
| NM_008824    | 6.27E-05    | <i>Pfkfb1</i>   |

**Appendix Table S1. KL-divergences for metabolic regulators.**

Listed are 478 regulators implicated in cellular metabolism, ranked by their descending KL-divergences as a quantitative measure of gene expression changes during the ESC-to-EpiLC transition.

For each transcript, the RefSeq accession number (column A), the KL-divergence (column B), and the gene name (column C) are provided.

| <b>Gene</b>  | <b>Name</b>          |
|--------------|----------------------|
| NM_001253857 | <i>Tet1</i>          |
| NM_008229    | <i>Hdac2</i>         |
| NM_010264    | <i>Nr6a1</i>         |
| NM_145211    | <i>Oas1a</i>         |
| NM_001164789 | <i>Eomes</i>         |
| NM_138606    | <i>Pim2</i>          |
| NM_145630    | <i>Pdk3</i>          |
| NM_011427    | <i>Snai1</i>         |
| NM_010413    | <i>Hdac6</i>         |
| NM_001040400 | <i>Tet2</i>          |
| NM_001164148 | <i>Tcf3</i>          |
| NM_001159500 | <i>Esrrb</i>         |
| NM_172665    | <i>Pdk1</i>          |
| NM_008012    | <i>Akr1b8</i>        |
| NM_013595    | <i>Mbd3</i>          |
| NM_009337    | <i>Tcl1</i>          |
| NM_011443    | <i>Sox2</i>          |
| NM_144841    | <i>Otx2</i>          |
| NM_007883    | <i>Dsg2</i>          |
| NM_011635    | <i>Trap1a</i>        |
| NM_025788    | <i>Nacc1</i>         |
| NM_001163641 | <i>Setdb1</i>        |
| NM_010203    | <i>Fgf5</i>          |
| NM_001100186 | <i>Zscan4d</i>       |
| NM_001184709 | <i>Tfdp2</i>         |
| NM_007669    | <i>Cdkn1a</i>        |
| NM_001017426 | <i>Kdm6b</i>         |
| NM_007664    | <i>Cdh2</i>          |
| NM_145604    | <i>D230025D16Rik</i> |
| NM_007430    | <i>Nr0b1</i>         |
| NM_008235    | <i>Hes1</i>          |
| NM_009483    | <i>Kdm6a</i>         |
| NM_023755    | <i>Tfcp2l1</i>       |
| NM_001111320 | <i>Idh1</i>          |
| NM_011263    | <i>Rest</i>          |
| NM_009769    | <i>Klf5</i>          |
| NM_010336    | <i>Lpar1</i>         |
| NM_001081209 | <i>Prdm14</i>        |
| NM_010021    | <i>Dazl</i>          |
| NM_007607    | <i>Car4</i>          |
| NM_010291    | <i>Gjb5</i>          |
| NM_009416    | <i>Tpm2</i>          |
| NM_010202    | <i>Fgf4</i>          |
| NM_021480    | <i>Tdh</i>           |
| NM_008131    | <i>Glul</i>          |

|              |                 |
|--------------|-----------------|
| NM_010094    | <i>Lefty1</i>   |
| NM_001031772 | <i>Lin28b</i>   |
| NM_030014    | <i>Hook1</i>    |
| NM_009522    | <i>Wnt3a</i>    |
| NM_175094    | <i>Pdpx</i>     |
| NM_007657    | <i>Cd9</i>      |
| NM_011978    | <i>Slc27a2</i>  |
| NM_025330    | <i>Hsd17b14</i> |
| NM_001146689 | <i>Ezh2</i>     |
| NM_001033638 | <i>Crxos1</i>   |
| NM_172118    | <i>Myl9</i>     |
| NM_028615    | <i>Dppa2</i>    |
| NM_146176    | <i>Cnot3</i>    |
| NM_011852    | <i>Oas1g</i>    |
| NM_001195003 | <i>Kat7</i>     |
| NM_009846    | <i>Cd24a</i>    |
| NM_147151    | <i>Ehmt2</i>    |
| NM_001252452 | <i>Pou5f1</i>   |
| NM_001160012 | <i>Gjb3</i>     |
| NM_172887    | <i>Fry</i>      |
| NM_021273    | <i>Ckb</i>      |
| NM_018777    | <i>Cldn6</i>    |
| NM_008430    | <i>Kcnk1</i>    |
| NM_010420    | <i>Hesx1</i>    |
| NM_009211    | <i>Smarcc1</i>  |
| NM_001159769 | <i>Nr5a2</i>    |
| NM_008452    | <i>Klf2</i>     |
| NM_028053    | <i>Tmem38b</i>  |
| NM_010446    | <i>Foxa2</i>    |
| NM_028016    | <i>Nanog</i>    |
| NM_011461    | <i>Spic</i>     |
| NM_177099    | <i>Lefty2</i>   |
| NM_009538    | <i>Plagl1</i>   |
| NM_173001    | <i>Kdm3a</i>    |
| NM_144873    | <i>Uhrf2</i>    |
| NM_011618    | <i>Tnnt1</i>    |
| NM_007554    | <i>Bmp4</i>     |
| NM_021531    | <i>Carm1</i>    |
| NM_001109991 | <i>Col18a1</i>  |
| NM_008808    | <i>Pdgfa</i>    |
| NM_016689    | <i>Aqp3</i>     |
| NM_001253679 | <i>Slc7a7</i>   |
| NM_016887    | <i>Cldn7</i>    |
| NM_001081256 | <i>Kdm3b</i>    |
| NM_001037711 | <i>Cgn</i>      |
| NM_181322    | <i>Ctcf</i>     |

|              |                |
|--------------|----------------|
| NM_011588    | <i>Trim28</i>  |
| NM_001172095 | <i>Kdm4c</i>   |
| NM_010637    | <i>Klf4</i>    |
| NM_001199433 | <i>Dnmt1</i>   |
| NM_013611    | <i>Nodal</i>   |
| NM_001111079 | <i>Uhrf1</i>   |
| NM_001109686 | <i>Ehmt1</i>   |
| NM_010242    | <i>Fut4</i>    |
| NM_009801    | <i>Car2</i>    |
| NM_009758    | <i>Bmpr1a</i>  |
| NM_001081695 | <i>Dnmt3l</i>  |
| NM_001081081 | <i>Gls</i>     |
| NM_013729    | <i>Mixl1</i>   |
| NM_001136069 | <i>Ldha</i>    |
| NM_007913    | <i>Egr1</i>    |
| NM_001032378 | <i>Pecam1</i>  |
| NM_001083316 | <i>Pdgfra</i>  |
| NM_016754    | <i>Mylpf</i>   |
| NM_007477    | <i>Arf2</i>    |
| NM_173011    | <i>ldh2</i>    |
| NM_009233    | <i>Sox1</i>    |
| NM_001244200 | <i>Pax6</i>    |
| NM_001081088 | <i>Lrp2</i>    |
| NM_001177602 | <i>Ak4</i>     |
| NM_001003960 | <i>Dnmt3b</i>  |
| NM_027941    | <i>Lrrc34</i>  |
| NM_027294    | <i>Cmtm8</i>   |
| NM_172262    | <i>Kdm1b</i>   |
| NM_009196    | <i>Slc16a1</i> |
| NM_028030    | <i>Rbpms2</i>  |
| NM_025569    | <i>Mgst3</i>   |
| NM_009864    | <i>Cdh1</i>    |
| NM_007872    | <i>Dnmt3a</i>  |
| NM_134102    | <i>Pla1a</i>   |
| NM_001033264 | <i>Gls2</i>    |
| NM_201395    | <i>Sall4</i>   |
| NM_008482    | <i>Lamb1</i>   |
| NM_008245    | <i>Hhex</i>    |
| NM_009482    | <i>Utf1</i>    |
| NM_013768    | <i>Prmt5</i>   |
| NM_011535    | <i>Tbx3</i>    |
| NM_008108    | <i>Gdf3</i>    |
| NM_010207    | <i>Fgfr2</i>   |
| NM_153791    | <i>Flywch1</i> |



**Appendix Table S2. Genes for fitting the pseudotime model.**

Listed are the 135 genes that were used to fit the pseudotime model.

For each gene, the RefSeq accession number (column A) and the name (column B) are provided.

| Fig       | n | p-value     | Comparison                          |
|-----------|---|-------------|-------------------------------------|
| <b>2B</b> | 2 | 0.000556193 | +2-DG vs +dH2O                      |
| <b>2C</b> | 3 | 0.014238593 | <i>Lin28b</i> +2-DG vs +dH2O        |
|           | 3 | 0.006765041 | <i>EsrrB</i> +2-DG vs +dH2O         |
|           | 2 | 0.046468823 | <i>Klf4</i> +2-DG vs +dH2O          |
|           | 2 | 0.010360148 | <i>Tfcp2l1</i> +2-DG vs +dH2O       |
|           | 3 | 0.030424339 | <i>Dnmt3b</i> +2-DG vs +dH2O        |
|           | 3 | 0.015651778 | <i>Fgf5</i> +2-DG vs +dH2O          |
| <b>2D</b> | 2 | 0.042402065 | +2-DG vs +dH2O                      |
| <b>3B</b> | 6 | 1.24128E-05 | +dm-aKG vs +DMSO                    |
| <b>3C</b> | 5 | 4.67982E-06 | <i>Tfcp2l1</i> +dm-aKG vs +DMSO     |
|           | 5 | 4.00312E-05 | <i>Klf4</i> +dm-aKG vs +DMSO        |
|           | 5 | 0.000422197 | <i>EsrrB</i> +dm-aKG vs +DMSO       |
|           | 5 | 0.000600534 | <i>Lin28b</i> +dm-aKG vs +DMSO      |
|           | 5 | 8.84076E-05 | <i>Dnmt3b</i> +dm-aKG vs +DMSO      |
|           | 5 | 0.002265556 | <i>Fgf5</i> +dm-aKG vs +DMSO        |
| <b>3D</b> | 4 | 0.028349939 | +dm-aKG vs +DMSO                    |
| <b>3G</b> | 2 | 0.047746434 | +dm-aKG vs +DMSO                    |
| <b>3H</b> | 2 | 0.153487504 | <i>EsrrB</i> d2.5 +dm-aKG vs +DMSO  |
|           | 2 | 0.032742698 | <i>EsrrB</i> d5 +dm-aKG vs +DMSO    |
|           | 2 | 0.10238989  | <i>EsrrB</i> d7.5 +dm-aKG vs +DMSO  |
|           | 2 | 0.025998096 | <i>EsrrB</i> d10 +dm-aKG vs +DMSO   |
|           | 2 | 0.004730053 | <i>Dnmt3b</i> d2.5 +dm-aKG vs +DMSO |
|           | 2 | 0.01030498  | <i>Dnmt3b</i> d5 +dm-aKG vs +DMSO   |
|           | 2 | 0.404009    | <i>Dnmt3b</i> d7.5 +dm-aKG vs +DMSO |
|           | 2 | 0.257992972 | <i>Dnmt3b</i> d10 +dm-aKG vs +DMSO  |
|           | 2 | 0.082621999 | <i>Fgf5</i> d2.5 +dm-aKG vs +DMSO   |
|           | 2 | 0.010375269 | <i>Fgf5</i> d5 +dm-aKG vs +DMSO     |
|           | 2 | 0.027319155 | <i>Fgf5</i> d7.5 +dm-aKG vs +DMSO   |
|           | 2 | 0.03390866  | <i>Fgf5</i> d10 +dm-aKG vs +DMSO    |
|           | 2 | 0.050105788 | <i>Tet2</i> d2.5 +dm-aKG vs +DMSO   |
|           | 2 | 0.00028121  | <i>Tet2</i> d5 +dm-aKG vs +DMSO     |
|           | 2 | 0.11442561  | <i>Tet2</i> d7.5 +dm-aKG vs +DMSO   |
|           | 2 | 0.031660152 | <i>Tet2</i> d10 +dm-aKG vs +DMSO    |
| <b>4A</b> | 2 | 0.052568457 | +dm-aKG vs +DMSO                    |
| <b>4B</b> | 2 | 0.074290139 | +BMP4 vs + dm-aKG                   |

|  |   |             |                  |
|--|---|-------------|------------------|
|  | 2 | 0.052563025 | +BMP4 vs +DMSO   |
|  | 2 | 0.15674842  | +dm-αKG vs +DMSO |

|           |   |             |                                            |
|-----------|---|-------------|--------------------------------------------|
| <b>4C</b> | 3 | 0.008864717 | +dm-αKG (72h EpiLCs) vs +DMSO (72h EpiLCs) |
|           | 3 | 0.046092821 | +dm-αKG (72h EpiLCs) vs +DMSO (48h EpiLCs) |
|           | 3 | 0.000276824 | +DMSO (72h EpiLCs) vs +DMSO (48h EpiLCs)   |

|           |   |             |                                            |
|-----------|---|-------------|--------------------------------------------|
| <b>4D</b> | 3 | 0.000505602 | <i>Prdm14</i> DMSO_GFP+ vs DMSO_GFP-       |
|           | 3 | 0.000594369 | <i>Prdm14</i> +dm-αKG_GFP+ vs dm-αKG_GFP-  |
|           | 3 | 0.005428973 | <i>Prdm14</i> +dm-αKG_GFP+ vs DMSO_GFP-    |
|           | 3 | 0.046649815 | <i>Prdm14</i> +dm-αKG_GFP- vs DMSO_GFP-    |
|           | 3 | 0.095377484 | <i>Prdm14</i> ESCs2iLIF5%FCS vs DMSO_GFP-  |
|           | 3 | 0.07119756  | <i>Prdm14</i> +dm-αKG_GFP+ vs DMSO_GFP+    |
|           | 3 | 0.001157328 | <i>Tfap2c</i> DMSO_GFP+ vs DMSO_GFP-       |
|           | 3 | 0.00102167  | <i>Tfap2c</i> +dm-αKG_GFP+ vs +dm-αKG_GFP- |
|           | 3 | 0.004270274 | <i>Tfap2c</i> +dm-αKG_GFP+ vs DMSO_GFP-    |
|           | 3 | 0.00268114  | <i>Tfap2c</i> +dm-αKG_GFP- vs DMSO_GFP-    |
|           | 3 | 0.07626715  | <i>Tfap2c</i> ESCs2iLIF5%FCS vs DMSO_GFP-  |
|           | 3 | 0.072583712 | <i>Tfap2c</i> +dm-αKG_GFP+ vs DMSO_GFP+    |
|           | 3 | 0.002443949 | <i>Prdm1</i> DMSO_GFP+ vs DMSO_GFP-        |
|           | 3 | 5.74216E-05 | <i>Prdm1</i> +dm-αKG_GFP+ vs +dm-αKG_GFP-  |
|           | 3 | 0.001053135 | <i>Prdm1</i> +dm-αKG_GFP+ vs DMSO_GFP-     |
|           | 3 | 0.124352909 | <i>Prdm1</i> +dm-αKG_GFP- vs DMSO_GFP-     |
|           | 3 | 0.356249305 | <i>Prdm1</i> ESCs2iLIF5%FCS vs DMSO_GFP-   |
|           | 3 | 0.189292957 | <i>Prdm1</i> +dm-αKG_GFP+ vs DMSO_GFP+     |
|           | 3 | 9.66341E-05 | <i>T</i> DMSO_GFP+ vs DMSO_GFP-            |
|           | 3 | 0.004635653 | <i>T</i> +dm-αKG_GFP+ vs +dm-αKG_GFP-      |
|           | 3 | 0.000963986 | <i>T</i> +dm-αKG_GFP+ vs DMSO_GFP-         |
|           | 3 | 0.178289372 | <i>T</i> +dm-αKG_GFP- vs DMSO_GFP-         |
|           | 3 | 0.337346401 | <i>T</i> ESCs2iLIF5%FCS vs DMSO_GFP-       |
|           | 3 | 0.279948864 | <i>T</i> +dm-αKG_GFP+ vs DMSO_GFP+         |
|           | 3 | 0.017320005 | <i>Klf4</i> DMSO_GFP+ vs DMSO_GFP-         |
|           | 3 | 0.002457419 | <i>Klf4</i> +dm-αKG_GFP+ vs +dm-αKG_GFP-   |
|           | 3 | 0.007728492 | <i>Klf4</i> +dm-αKG_GFP+ vs DMSO_GFP-      |
|           | 3 | 0.480714886 | <i>Klf4</i> +dm-αKG_GFP- vs DMSO_GFP-      |
|           | 3 | 0.016079347 | <i>Klf4</i> ESCs2iLIF5%FCS vs DMSO_GFP-    |
|           | 3 | 0.071818665 | <i>Klf4</i> +dm-αKG_GFP+ vs DMSO_GFP+      |
|           | 3 | 0.007647435 | <i>Tet1</i> DMSO_GFP+ vs DMSO_GFP-         |
|           | 3 | 0.020882404 | <i>Tet1</i> +dm-αKG_GFP+ vs +dm-αKG_GFP-   |
|           | 3 | 0.015523272 | <i>Tet1</i> +dm-αKG_GFP+ vs DMSO_GFP-      |
|           | 3 | 0.024173901 | <i>Tet1</i> +dm-αKG_GFP- vs DMSO_GFP-      |
|           | 3 | 0.014522612 | <i>Tet1</i> ESCs2iLIF5%FCS vs DMSO_GFP-    |
|           | 3 | 0.297380564 | <i>Tet1</i> +dm-αKG_GFP+ vs DMSO_GFP+      |
|           | 3 | 0.012565123 | <i>Kdm3a</i> DMSO_GFP+ vs DMSO_GFP-        |
|           | 3 | 0.005166908 | <i>Kdm3a</i> +dm-αKG_GFP+ vs +dm-αKG_GFP-  |
|           | 3 | 0.023953856 | <i>Kdm3a</i> +dm-αKG_GFP+ vs DMSO_GFP-     |

|  |   |             |                                           |
|--|---|-------------|-------------------------------------------|
|  | 3 | 0.00027185  | <i>Kdm3a</i> +dm-αKG_GFP- vs DMSO_GFP-    |
|  | 3 | 0.044002447 | <i>Kdm3a</i> ESCs2iLIF5%FCS vs DMSO_GFP-  |
|  | 3 | 0.036463312 | <i>Kdm3a</i> +dm-αKG_GFP+ vs DMSO_GFP+    |
|  | 3 | 0.001949632 | <i>Kdm3b</i> DMSO_GFP+ vs DMSO_GFP-       |
|  | 3 | 0.00064076  | <i>Kdm3b</i> +dm-αKG_GFP+ vs +dm-αKG_GFP- |
|  | 3 | 0.003405594 | <i>Kdm3b</i> +dm-αKG_GFP+ vs DMSO_GFP-    |
|  | 3 | 0.017466334 | <i>Kdm3b</i> +dm-αKG_GFP- vs DMSO_GFP-    |
|  | 3 | 0.019062979 | <i>Kdm3b</i> ESCs2iLIF5%FCS vs DMSO_GFP-  |
|  | 3 | 0.023321596 | <i>Kdm3b</i> +dm-αKG_GFP+ vs DMSO_GFP+    |
|  | 3 | 0.033606632 | <i>Gata6</i> DMSO_GFP+ vs DMSO_GFP-       |
|  | 3 | 0.000891054 | <i>Gata6</i> +dm-αKG_GFP+ vs +dm-αKG_GFP- |
|  | 3 | 0.003758573 | <i>Gata6</i> +dm-αKG_GFP+ vs DMSO_GFP-    |
|  | 3 | 0.215129728 | <i>Gata6</i> +dm-αKG_GFP- vs DMSO_GFP-    |
|  | 3 | 0.001590893 | <i>Gata6</i> ESCs2iLIF5%FCS vs DMSO_GFP-  |
|  | 3 | 0.014667648 | <i>Gata6</i> +dm-αKG_GFP+ vs DMSO_GFP+    |

|           |   |             |                                                                     |
|-----------|---|-------------|---------------------------------------------------------------------|
| <b>4F</b> | 3 | 0.000284149 | <i>EsrrB</i> enh H3K9me2 ESCs2iLIF vs 48hEpiLCs +DMSO               |
|           | 3 | 0.010957391 | <i>EsrrB</i> enh H3K27me3 ESCs2iLIF vs 48hEpiLCs +DMSO              |
|           | 3 | 0.007174212 | <i>EsrrB</i> enh H3K9me2 48hEpiLCs +4mM dm-αKG vs 48hEpiLCs +DMSO   |
|           | 3 | 0.005880579 | <i>EsrrB</i> enh H3K27me3 48hEpiLCs +4mM dm-αKG vs 48hEpiLCs +DMSO  |
|           | 3 | 0.000991393 | <i>Arid5b</i> enh H3K9me2 ESCs2iLIF vs 48hEpiLCs +DMSO              |
|           | 3 | 0.069955607 | <i>Arid5b</i> enh H3K27me3 ESCs2iLIF vs 48hEpiLCs +DMSO             |
|           | 3 | 0.005480763 | <i>Arid5b</i> enh H3K9me2 48hEpiLCs +4mM dm-αKG vs 48hEpiLCs +DMSO  |
|           | 3 | 0.021563945 | <i>Arid5b</i> enh H3K27me3 48hEpiLCs +4mM dm-αKG vs 48hEpiLCs +DMSO |
|           | 3 | 0.004390116 | <i>Tfap2c</i> enh H3K9me2 ESCs2iLIF vs 48hEpiLCs +DMSO              |
|           | 3 | 0.436001715 | <i>Tfap2c</i> enh H3K27me3 ESCs2iLIF vs 48hEpiLCs +DMSO             |
|           | 3 | 0.097645967 | <i>Tfap2c</i> enh H3K9me2 48hEpiLCs +4mM dm-αKG vs 48hEpiLCs +DMSO  |
|           | 3 | 0.153514399 | <i>Tfap2c</i> enh H3K27me3 48hEpiLCs +4mM dm-αKG vs 48hEpiLCs +DMSO |

|             |   |             |                                    |
|-------------|---|-------------|------------------------------------|
| <b>EV2A</b> | 2 | 0.041387046 | ESCs2iLIF vs 72hEpiLCs +dH2O       |
|             | 2 | 0.010387443 | 72hEpiLCs +2-DG vs 72hEpiLCs +dH2O |

|             |   |             |                    |
|-------------|---|-------------|--------------------|
| <b>EV2D</b> | 2 | 0.183620097 | +5mM DCA vs +dH2O  |
|             | 2 | 0.150459221 | +10mM DCA vs +dH2O |
|             | 2 | 0.04029871  | +20mM DCA vs +dH2O |

|             |   |             |                                  |
|-------------|---|-------------|----------------------------------|
| <b>EV2F</b> | 2 | 0.157774105 | <i>Lin28b</i> +5mM DCA vs +dH2O  |
|             | 2 | 0.111931933 | <i>Lin28b</i> +10mM DCA vs +dH2O |
|             | 2 | 0.145646414 | <i>Lin28b</i> +20mM DCA vs +dH2O |
|             | 2 | 0.427318149 | <i>EsrrB</i> +5mM DCA vs +dH2O   |
|             | 2 | 0.21234911  | <i>EsrrB</i> +10mM DCA vs +dH2O  |
|             | 2 | 0.074394245 | <i>EsrrB</i> +20mM DCA vs +dH2O  |
|             | 2 | 0.134051939 | <i>Klf4</i> +5mM DCA vs +dH2O    |
|             | 2 | 0.112355864 | <i>Klf4</i> +10mM DCA vs +dH2O   |
|             | 2 | 0.080622567 | <i>Klf4</i> +20mM DCA vs +dH2O   |
|             | 2 | 0.349661032 | <i>Dnmt3b</i> +5mM DCA vs +dH2O  |

|  |   |             |                                   |
|--|---|-------------|-----------------------------------|
|  | 2 | 0.380856181 | <i>Dnmt3b</i> +10mM DCA vs +dH2O  |
|  | 2 | 0.289197505 | <i>Dnmt3b</i> +20mM DCA vs +dH2O  |
|  | 2 | 0.407643535 | <i>Tfcp2l1</i> +5mM DCA vs +dH2O  |
|  | 2 | 0.228754887 | <i>Tfcp2l1</i> +10mM DCA vs +dH2O |
|  | 2 | 0.024638338 | <i>Tfcp2l1</i> +20mM DCA vs +dH2O |
|  | 2 | 0.028868254 | <i>Fgf5</i> +5mM DCA vs +dH2O     |
|  | 2 | 0.07393582  | <i>Fgf5</i> +10mM DCA vs +dH2O    |
|  | 2 | 0.200097509 | <i>Fgf5</i> +20mM DCA vs +dH2O    |

|             |   |             |                    |
|-------------|---|-------------|--------------------|
| <b>EV2G</b> | 2 | 0.131653947 | +5mM DCA vs +dH2O  |
|             | 2 | 0.120140876 | +10mM DCA vs +dH2O |
|             | 2 | 0.152246216 | +20mM DCA vs +dH2O |

|             |   |             |                               |
|-------------|---|-------------|-------------------------------|
| <b>EV3B</b> | 3 | 0.304305337 | +1mM dm- $\alpha$ KG vs +DMSO |
|             | 3 | 0.008059951 | +2mM dm- $\alpha$ KG vs +DMSO |
|             | 3 | 0.00108903  | +4mM dm- $\alpha$ KG vs +DMSO |

|             |   |             |                                                            |
|-------------|---|-------------|------------------------------------------------------------|
| <b>EV3H</b> | 2 | 0.331783672 | +4mM dm- $\alpha$ KG -> released Activin/Fgf vs 48h EpiLCs |
|             | 2 | 0.051728687 | +4mM dm- $\alpha$ KG -> released2i/Lif vs 48h EpiLCs       |

|             |   |             |                            |
|-------------|---|-------------|----------------------------|
| <b>EV4A</b> | 4 | 0.005818559 | +4mM Na-Citrate vs +dH2O   |
|             | 2 | 0.128714471 | +4mM dm-Succinate vs +DMSO |

|             |   |             |                            |
|-------------|---|-------------|----------------------------|
| <b>EV4C</b> | 2 | 0.045883241 | +4mM Na-Citrate vs +dH2O   |
|             | 2 | 0.470474746 | +4mM dm-Succinate vs +DMSO |

|             |   |             |                        |
|-------------|---|-------------|------------------------|
| <b>EV4E</b> | 2 | 0.457979591 | +0.1uM CDK4i vs +DMSO  |
|             | 2 | 0.433421311 | +0.25uM CDK4i vs +DMSO |
|             | 2 | 0.192636681 | +0.5uM CDK4i vs +DMSO  |
|             | 2 | 0.109439671 | +0.75uM CDK4i vs +DMSO |
|             | 2 | 0.037459896 | +1uM CDK4i vs +DMSO    |

|             |   |             |                                                   |
|-------------|---|-------------|---------------------------------------------------|
| <b>EV4G</b> | 2 | 0.017500278 | <i>Lin28b</i> +4mM dm- $\alpha$ KG vs +1uM CDK4i  |
|             | 2 | 0.02961682  | <i>Dnmt3b</i> +4mM dm- $\alpha$ KG vs +1uM CDK4i  |
|             | 2 | 0.00112543  | <i>EsrrB</i> +4mM dm- $\alpha$ KG vs +1uM CDK4i   |
|             | 2 | 0.00180433  | <i>Fgf5</i> +4mM dm- $\alpha$ KG vs +1uM CDK4i    |
|             | 2 | 0.02305842  | <i>Klf4</i> +4mM dm- $\alpha$ KG vs +1uM CDK4i    |
|             | 2 | 0.064461172 | <i>Tfcp2l1</i> +4mM dm- $\alpha$ KG vs +1uM CDK4i |

|             |   |             |                             |
|-------------|---|-------------|-----------------------------|
| <b>EV4H</b> | 2 | 0.061701595 | <i>siKdm3a</i> vs siControl |
|             | 2 | 0.0327255   | <i>siKdm3b</i> vs siControl |

|             |   |             |                           |
|-------------|---|-------------|---------------------------|
| <b>EV4I</b> | 2 | 0.043779467 | +dm- $\alpha$ KG vs +DMSO |
|-------------|---|-------------|---------------------------|

|             |   |             |                                           |
|-------------|---|-------------|-------------------------------------------|
| <b>EV4J</b> | 5 | 0.038847101 | <i>Tfcp2l1</i> ( <i>Tet1/2</i> DKO vs WT) |
|             | 5 | 0.119118313 | <i>Klf4</i> ( <i>Tet1/2</i> DKO vs WT)    |

|  |   |             |                                          |
|--|---|-------------|------------------------------------------|
|  | 5 | 0.481939279 | <i>EsrrB</i> ( <i>Tet1/2</i> DKO vs WT)  |
|  | 5 | 0.008729113 | <i>Lin28b</i> ( <i>Tet1/2</i> DKO vs WT) |
|  | 5 | 0.043058337 | <i>Dnmt3b</i> ( <i>Tet1/2</i> DKO vs WT) |
|  | 5 | 0.025826395 | <i>Otx2</i> ( <i>Tet1/2</i> DKO vs WT)   |

|             |   |             |                                                           |
|-------------|---|-------------|-----------------------------------------------------------|
| <b>EV5A</b> | 3 | 0.005722295 | <i>Idh2</i> ( <i>Prdm1</i> -GFP+ vs <i>Prdm1</i> -GFP-)   |
|             | 3 | 0.011751869 | <i>Cox7a1</i> ( <i>Prdm1</i> -GFP+ vs <i>Prdm1</i> -GFP-) |
|             | 3 | 0.371416263 | <i>Cpt1a</i> ( <i>Prdm1</i> -GFP+ vs <i>Prdm1</i> -GFP-)  |
|             | 3 | 0.014510348 | <i>Pdk1</i> ( <i>Prdm1</i> -GFP+ vs <i>Prdm1</i> -GFP-)   |
|             | 3 | 0.070921025 | <i>Pdk3</i> ( <i>Prdm1</i> -GFP+ vs <i>Prdm1</i> -GFP-)   |
|             | 3 | 0.092846755 | <i>Gapdh</i> ( <i>Prdm1</i> -GFP+ vs <i>Prdm1</i> -GFP-)  |

|             |   |             |                                                                    |
|-------------|---|-------------|--------------------------------------------------------------------|
| <b>EV5C</b> | 2 | 0.119499001 | <i>Blimp1</i> AllCytokines+dm-αKG_GFP+ vs AllCytokines_GFP+        |
|             | 2 | 0.00320236  | <i>Blimp1</i> AllCytokines_GFP+ vs AllCytokines_GFP-               |
|             | 2 | 0.005772912 | <i>Blimp1</i> AllCytokines+dm-αKG_GFP+ vs AllCytokines+dm-αKG_GFP- |
|             | 2 | 0.009789637 | <i>Blimp1</i> AllCytokines+dm-αKG_GFP+ vs AllCytokines_GFP-        |
|             | 2 | 0.425403723 | <i>Blimp1</i> AllCytokines+dm-αKG_GFP- vs AllCytokines_GFP-        |
|             | 2 | 0.02205144  | <i>Blimp1</i> ESCs2iLIF5%FCS vs AllCytokines_GFP-                  |
|             | 2 | 0.296335044 | <i>Prdm14</i> AllCytokines+dm-αKG_GFP+ vs AllCytokines_GFP+        |
|             | 2 | 0.03368512  | <i>Prdm14</i> AllCytokines_GFP+ vs AllCytokines_GFP-               |
|             | 2 | 0.013636665 | <i>Prdm14</i> AllCytokines+dm-αKG_GFP+ vs AllCytokines+dm-αKG_GFP- |
|             | 2 | 0.04803251  | <i>Prdm14</i> AllCytokines+dm-αKG_GFP+ vs AllCytokines_GFP-        |
|             | 2 | 0.120338088 | <i>Prdm14</i> AllCytokines+dm-αKG_GFP- vs AllCytokines_GFP-        |
|             | 2 | 0.064752689 | <i>Prdm14</i> ESCs2iLIF5%FCS vs AllCytokines_GFP-                  |
|             | 2 | 0.46414875  | <i>Tfap2c</i> AllCytokines+dm-αKG_GFP+ vs AllCytokines_GFP+        |
|             | 2 | 0.002277604 | <i>Tfap2c</i> AllCytokines_GFP+ vs AllCytokines_GFP-               |
|             | 2 | 0.003123253 | <i>Tfap2c</i> AllCytokines+dm-αKG_GFP+ vs AllCytokines+dm-αKG_GFP- |
|             | 2 | 0.016631347 | <i>Tfap2c</i> AllCytokines+dm-αKG_GFP+ vs AllCytokines_GFP-        |
|             | 2 | 0.193431608 | <i>Tfap2c</i> AllCytokines+dm-αKG_GFP- vs AllCytokines_GFP-        |
|             | 2 | 0.006653792 | <i>Tfap2c</i> ESCs2iLIF5%FCS vs AllCytokines_GFP-                  |
|             | 2 | 0.40721904  | <i>T</i> AllCytokines+dm-αKG_GFP+ vs AllCytokines_GFP+             |
|             | 2 | 0.099425306 | <i>T</i> AllCytokines_GFP+ vs AllCytokines_GFP-                    |
|             | 2 | 0.002143067 | <i>T</i> AllCytokines+dm-αKG_GFP+ vs AllCytokines+dm-αKG_GFP-      |
|             | 2 | 0.01305198  | <i>T</i> AllCytokines+dm-αKG_GFP+ vs AllCytokines_GFP-             |
|             | 2 | 0.236767046 | <i>T</i> AllCytokines+dm-αKG_GFP- vs AllCytokines_GFP-             |
|             | 2 | 0.016854381 | <i>T</i> ESCs2iLIF5%FCS vs AllCytokines_GFP-                       |
|             | 2 | 0.08122742  | <i>Klf4</i> AllCytokines+dm-αKG_GFP+ vs AllCytokines_GFP+          |
|             | 2 | 0.041596401 | <i>Klf4</i> AllCytokines_GFP+ vs AllCytokines_GFP-                 |
|             | 2 | 0.030730599 | <i>Klf4</i> AllCytokines+dm-αKG_GFP+ vs AllCytokines+dm-αKG_GFP-   |
|             | 2 | 0.001855506 | <i>Klf4</i> AllCytokines+dm-αKG_GFP+ vs AllCytokines_GFP-          |
|             | 2 | 0.136728153 | <i>Klf4</i> AllCytokines+dm-αKG_GFP- vs AllCytokines_GFP-          |
|             | 2 | 0.004288351 | <i>Klf4</i> ESCs2iLIF5%FCS vs AllCytokines_GFP-                    |
|             | 2 | 0.052996385 | <i>Tet1</i> AllCytokines+dm-αKG_GFP+ vs AllCytokines_GFP+          |
|             | 2 | 0.010139781 | <i>Tet1</i> AllCytokines_GFP+ vs AllCytokines_GFP-                 |
|             | 2 | 0.000211324 | <i>Tet1</i> AllCytokines+dm-αKG_GFP+ vs AllCytokines+dm-αKG_GFP-   |
|             | 2 | 0.005476443 | <i>Tet1</i> AllCytokines+dm-αKG_GFP+ vs AllCytokines_GFP-          |

|  |   |             |                                                                   |
|--|---|-------------|-------------------------------------------------------------------|
|  | 2 | 0.017402671 | <i>Tet1</i> AllCytokines+dm-αKG_GFP- vs AllCytokines_GFP-         |
|  | 2 | 0.063683852 | <i>Tet1</i> ESCs2iLIF5%FCS vs AllCytokines_GFP-                   |
|  | 2 | 0.221055583 | <i>Kdm3a</i> AllCytokines+dm-αKG_GFP+ vs AllCytokines_GFP+        |
|  | 2 | 0.012836459 | <i>Kdm3a</i> AllCytokines_GFP+ vs AllCytokines_GFP-               |
|  | 2 | 0.007308207 | <i>Kdm3a</i> AllCytokines+dm-αKG_GFP+ vs AllCytokines+dm-αKG_GFP- |
|  | 2 | 0.02863749  | <i>Kdm3a</i> AllCytokines+dm-αKG_GFP+ vs AllCytokines_GFP-        |
|  | 2 | 0.257117482 | <i>Kdm3a</i> AllCytokines+dm-αKG_GFP- vs AllCytokines_GFP-        |
|  | 2 | 0.02899936  | <i>Kdm3a</i> ESCs2iLIF5%FCS vs AllCytokines_GFP-                  |
|  | 2 | 0.175901061 | <i>Kdm3b</i> AllCytokines+dm-αKG_GFP+ vs AllCytokines_GFP+        |
|  | 2 | 0.023258539 | <i>Kdm3b</i> AllCytokines_GFP+ vs AllCytokines_GFP-               |
|  | 2 | 0.001837072 | <i>Kdm3b</i> AllCytokines+dm-αKG_GFP+ vs AllCytokines+dm-αKG_GFP- |
|  | 2 | 0.010703307 | <i>Kdm3b</i> AllCytokines+dm-αKG_GFP+ vs AllCytokines_GFP-        |
|  | 2 | 0.09738762  | <i>Kdm3b</i> AllCytokines+dm-αKG_GFP- vs AllCytokines_GFP-        |
|  | 2 | 0.012167613 | <i>Kdm3b</i> ESCs2iLIF5%FCS vs AllCytokines_GFP-                  |
|  | 2 | 0.103266633 | <i>Gata6</i> AllCytokines+dm-αKG_GFP+ vs AllCytokines_GFP+        |
|  | 2 | 0.041546603 | <i>Gata6</i> AllCytokines_GFP+ vs AllCytokines_GFP-               |
|  | 2 | 0.092171079 | <i>Gata6</i> AllCytokines+dm-αKG_GFP+ vs AllCytokines+dm-αKG_GFP- |
|  | 2 | 0.011171875 | <i>Gata6</i> AllCytokines+dm-αKG_GFP+ vs AllCytokines_GFP-        |
|  | 2 | 0.117562607 | <i>Gata6</i> AllCytokines+dm-αKG_GFP- vs AllCytokines_GFP-        |
|  | 2 | 0.0296814   | <i>Gata6</i> ESCs2iLIF5%FCS vs AllCytokines_GFP-                  |

|             |   |             |                                                       |
|-------------|---|-------------|-------------------------------------------------------|
| <b>EV5F</b> | 2 | 0.102009272 | +SCF+LIF+EGF+dm-αKG+BMP4i vs +SCF+LIF+EGF+dm-αKG+DMSO |
|             | 2 | 0.196881478 | +SCF+LIF+EGF+dm-αKG+BMP4i vs +SCF+LIF+EGF+DMSO+DMSO   |
|             | 2 | 0.044832839 | +SCF+LIF+EGF+dm-αKG+DMSO vs +SCF+LIF+EGF+DMSO+DMSO    |

|             |   |             |                  |
|-------------|---|-------------|------------------|
| <b>EV6A</b> | 3 | 0.003469055 | +dm-αKG vs +DMSO |
|-------------|---|-------------|------------------|

|             |   |             |                                                                     |
|-------------|---|-------------|---------------------------------------------------------------------|
| <b>EV6D</b> | 3 | 0.001602473 | <i>Nanog</i> enh H3K9me2 ESCs2iLIF vs 48hEpiLCs +DMSO               |
|             | 3 | 0.371255077 | <i>Nanog</i> enh H3K27me3 ESCs2iLIF vs 48hEpiLCs +DMSO              |
|             | 3 | 0.006895074 | <i>Nanog</i> enh H3K9me2 48hEpiLCs +4mM dm-αKG vs 48hEpiLCs +DMSO   |
|             | 3 | 0.024282058 | <i>Nanog</i> enh H3K27me3 48hEpiLCs +4mM dm-αKG vs 48hEpiLCs +DMSO  |
|             | 3 | 0.002797141 | <i>Prdm14</i> enh H3K9me2 ESCs2iLIF vs 48hEpiLCs +DMSO              |
|             | 3 | 0.306086379 | <i>Prdm14</i> enh H3K27me3 ESCs2iLIF vs 48hEpiLCs +DMSO             |
|             | 3 | 0.013831917 | <i>Prdm14</i> enh H3K9me2 48hEpiLCs +4mM dm-αKG vs 48hEpiLCs +DMSO  |
|             | 3 | 0.217419344 | <i>Prdm14</i> enh H3K27me3 48hEpiLCs +4mM dm-αKG vs 48hEpiLCs +DMSO |
|             | 3 | 0.000610051 | <i>Pdgfa</i> enh H3K9me2 ESCs2iLIF vs 48hEpiLCs +DMSO               |
|             | 3 | 7.22861E-05 | <i>Pdgfa</i> enh H3K27me3 ESCs2iLIF vs 48hEpiLCs +DMSO              |
|             | 3 | 0.054135327 | <i>Pdgfa</i> enh H3K9me2 48hEpiLCs +4mM dm-αKG vs 48hEpiLCs +DMSO   |
|             | 3 | 0.011404521 | <i>Pdgfa</i> enh H3K27me3 48hEpiLCs +4mM dm-αKG vs 48hEpiLCs +DMSO  |
|             | 3 | 0.298381604 | <i>Tfap2c</i> pro H3K9me2 ESCs2iLIF vs 48hEpiLCs +DMSO              |
|             | 3 | 0.000155902 | <i>Tfap2c</i> pro H3K27me3 ESCs2iLIF vs 48hEpiLCs +DMSO             |
|             | 3 | 0.128866349 | <i>Tfap2c</i> pro H3K9me2 48hEpiLCs +4mM dm-αKG vs 48hEpiLCs +DMSO  |
|             | 3 | 0.207415776 | <i>Tfap2c</i> pro H3K27me3 48hEpiLCs +4mM dm-αKG vs 48hEpiLCs +DMSO |

**Appendix Table S3. P-Values Table.**

P-values for all statistically evaluated data sets are listed. For each data set, the corresponding figure panel (column A), the number of independent biological replicates (column B), the  $p$ -values (column C), and the conditions that were compared (column D) are provided.
